# Supplementary material for: Acoustic deterrents influence foraging activity, flight and echolocation behaviour of free-flying bats
Source: Oxford University Press journal article supplement (doi:10.1242/jeb.242715), 2021-10-04
Supplement: jeb242715supp.pdf [file jeb242715supp.pdf]

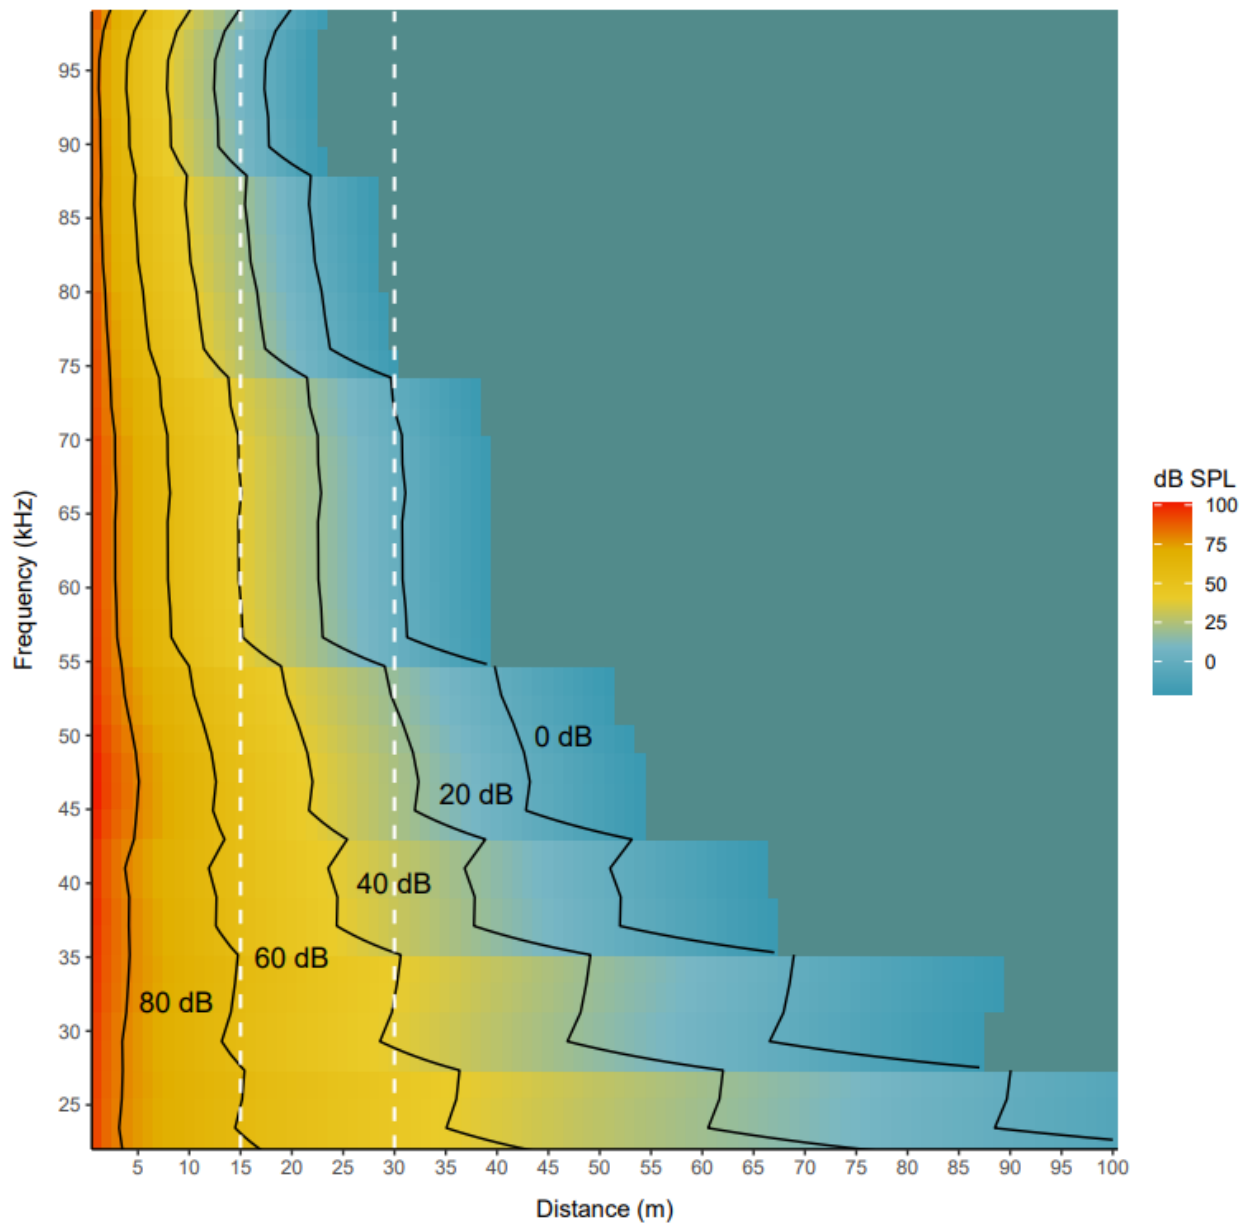

**Fig. S1.** Heat map of predicted dB SPL (RMS amplitude) for 20-100 kHz broadcast by Deaton deterrent speaker unit over distances of 1-100 m, including contours at 0, 20, 40, 60, 80 dB SPL. White dashed lines indicate fine-scale distance experiment treatment area of 15-30 m. Calculated using calibrated anechoic chamber recordings using spreading loss equations (one way), taking into account atmospheric attenuation and frequency-dependent absorption at 14°C, 90% relative humidity and 101.325 kPa (Bazley 1976; Møhl 1988; Holderied & von Helversen 2003). Teal grey background represents no data (-20 dB SPL and below). Stepped levels due to rounded values for atmospheric attenuation used in calculations.

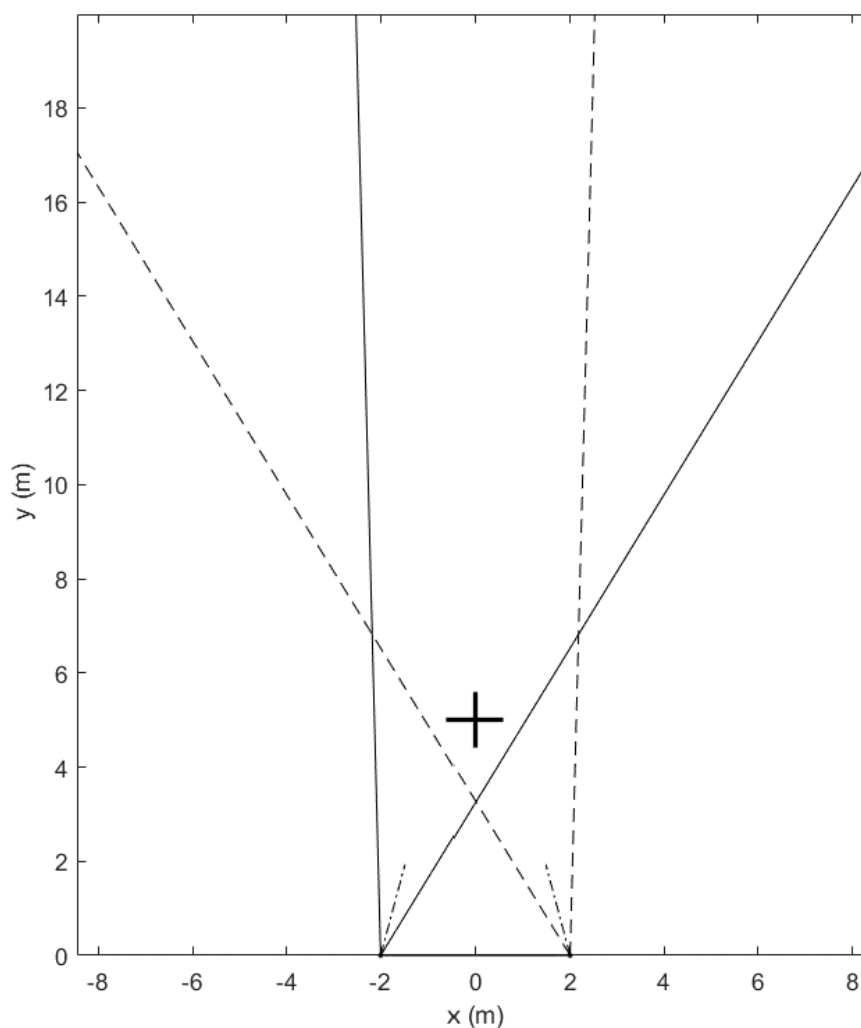

**Fig. S2.** Calibration set-up, with two thermal imaging cameras with  $33^\circ$  opening angles, positioned at 4 m apart. Camera positioning created a ~4 m wide overlapped field of view (FOV) at 0-20 m. Calibration target represented as a cross plotted at 5 m. Diagram created in MATLAB, to scale.

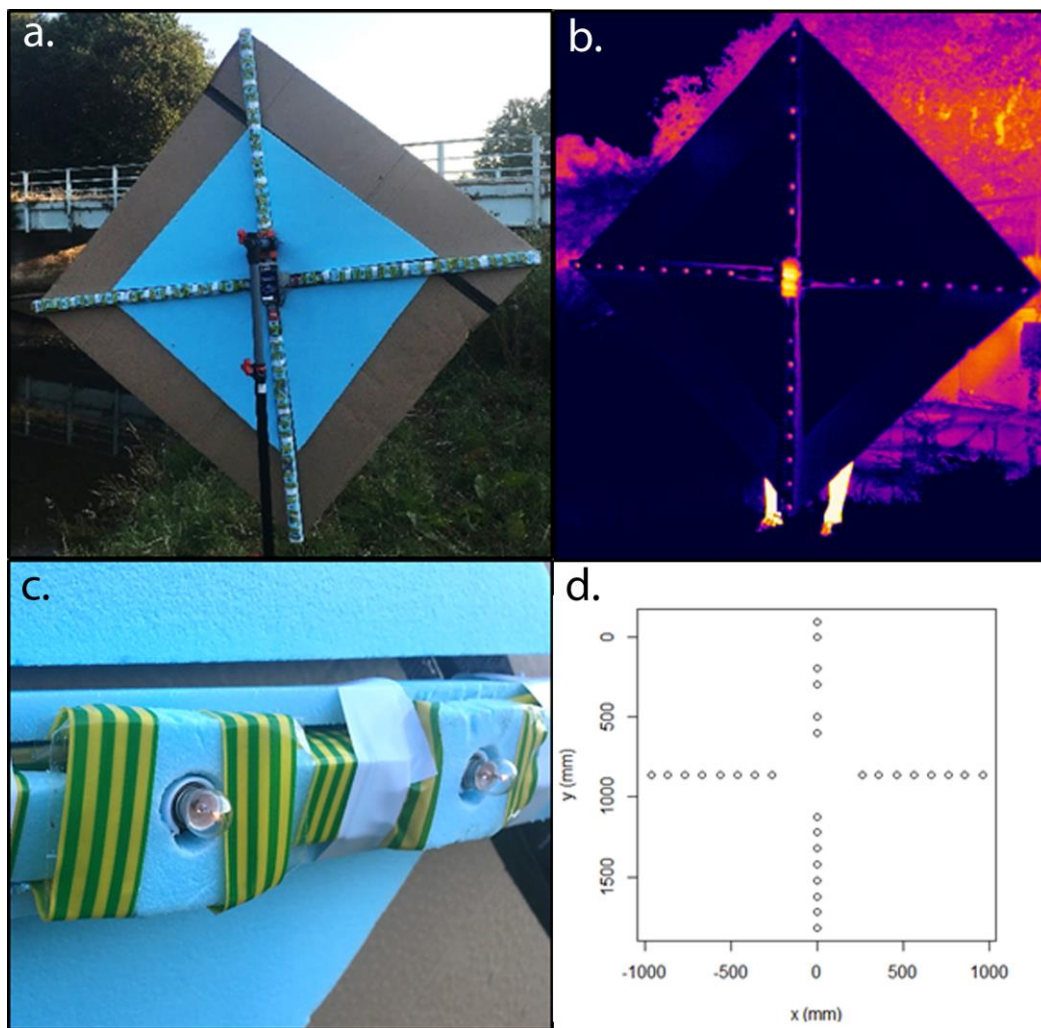

**Fig. S3.** Images of bespoke calibration target: (a) target in situ at a riparian site, (b) thermal image still of target, (c) close-up of one arm, showing bulbs and insulation and (d) scatter plot showing bulb coordinates used to develop MatchPoint 1.0 software. Photo/image credits L.R.V. Gilmour.

**Table S1.** Model selection statistics for trajectory measurements, arranged by AICc weight (AICc Wt) and including number of model parameters (K), cumulative AICc weight (Cum. Wt).

| Measurement         | Model                               | Distribution | Link          | K | AICc     | ΔAICc | AICc Wt | Cum. Wt |
|---------------------|-------------------------------------|--------------|---------------|---|----------|-------|---------|---------|
| <b>Speed (m/s)</b>  | Deterrent + block number            | Gaussian     | NA            | 7 | 2922.17  | 0     | 0.974   | 0.97    |
|                     | Deterrent + depth + block number    | Gaussian     | NA            | 8 | 2929.52  | 7.3   | 0.025   | 1       |
|                     | Deterrent + depth * block number    | Gaussian     | NA            | 9 | 2936.13  | 14    | 0.001   | 1       |
|                     | Block number                        | Gaussian     | NA            | 6 | 2943.11  | 20.9  | 0.001   | 1       |
|                     | Deterrent                           | Gaussian     | NA            | 6 | 2945.36  | 23.2  | 0.001   | 1       |
|                     | Deterrent + depth                   | Gaussian     | NA            | 7 | 2952.64  | 30.5  | 0.001   | 1       |
|                     | Deterrent * depth * block number    | Gaussian     | NA            | # | 2955.43  | 33.3  | 0.001   | 1       |
| <b>Tortuosity</b>   | Deterrent + distance                | cloglog      | beta binomial | 7 | -4371.58 | 0     | 0.24    | 0.24    |
|                     | Deterrent + distance                | logit        | beta binomial | 7 | -4371.31 | 0.3   | 0.21    | 0.45    |
|                     | Deterrent * distance + block number | cloglog      | beta binomial | 9 | -4371.23 | 0.4   | 0.2     | 0.65    |
|                     | Deterrent + block number            | probit       | beta binomial | 7 | -4370.73 | 0.9   | 0.16    | 0.8     |
|                     | Deterrent + distance + block number | cloglog      | beta binomial | 8 | -4369.63 | 1.9   | 0.09    | 0.89    |
|                     | Distance                            | cloglog      | beta binomial | 6 | -4369.3  | 2.3   | 0.08    | 0.97    |
|                     | Deterrent                           | cloglog      | beta binomial | 6 | -4367.61 | 4     | 0.03    | 1       |
| <b>Distance (m)</b> | Deterrent                           | Gaussian     | NA            | 6 | 6239.36  | 0     | 0.868   | 0.87    |
|                     | Deterrent + block number            | Gaussian     | NA            | 7 | 6243.69  | 4.3   | 0.099   | 0.97    |
|                     | Deterrent * block number            | Gaussian     | NA            | 8 | 6246.42  | 7.1   | 0.026   | 0.99    |
|                     | null                                | Gaussian     | NA            | 5 | 6249.01  | 9.7   | 0.007   | 1       |
| <b>Length (m)</b>   | null                                | Gaussian     | NA            | 5 | 9.995264 | 0     | 0.971   | 0.97    |
|                     | Deterrent                           | Gaussian     | NA            | 6 | 17.04132 | 7     | 0.029   | 1       |
|                     | Deterrent + distance                | Gaussian     | NA            | 7 | 27.00289 | 17    | 0       | 1       |
|                     | Deterrent + distance + block number | Gaussian     | NA            | 8 | 38.6426  | 28.6  | 0       | 1       |
|                     | Deterrent * distance + block number | Gaussian     | NA            | 9 | 46.47199 | 36.5  | 0       | 1       |
| <b>Height (m)</b>   | null                                | Gaussian     | NA            | 5 | 314.6157 | 0     | 0.952   | 0.95    |
|                     | Deterrent                           | Gaussian     | NA            | 6 | 320.6235 | 6     | 0.047   | 1       |
|                     | Deterrent + block number            | Gaussian     | NA            | 7 | 329.2744 | 14.7  | <0.001  | 1       |
|                     | Deterrent * block number            | Gaussian     | NA            | 8 | 336.5071 | 21.9  | <0.001  | 1       |

**Table S2.** Model selection statistics for pass data of *Pipistrellus pygmaeus*, *P. pipistrellus*, *Myotis* spp., *Nyctalus* and *Eptesicus* spp. and *P. pygmaeus* feeding buzz (fb)/social call (sc) data. Models arranged by AICc weight (AICc Wt) and include number of model parameters (K), cumulative AICc weight (Cum. Wt).

| Species                                   | Model link             | Distribution | K                 | AICc | ΔAICc   | AICc Wt | Cum. Wt |
|-------------------------------------------|------------------------|--------------|-------------------|------|---------|---------|---------|
| <i>P. pygmaeus</i>                        | Deterrent              | log          | Poisson           | 6    | 6723.37 | 0.00    | 0.60    |
|                                           | Deterrent + time block | log          | Poisson           | 5    | 6724.78 | 1.40    | 0.29    |
|                                           | Deterrent              | log          | Negative binomial | 6    | 6726.82 | 3.50    | 0.11    |
|                                           | null                   | log          | Poisson           | 4    | 6738.70 | 15.30   | 0.00    |
| <i>Myotis</i> spp.                        | Deterrent + time block | log          | Poisson           | 6    | 2702.84 | 0.00    | 0.73    |
|                                           | Deterrent + time block | log          | Negative binomial | 7    | 2704.84 | 2.00    | 0.27    |
|                                           | Time block             | log          | Poisson           | 5    | 2712.10 | 9.30    | 0.01    |
|                                           | Deterrent              | log          | Poisson           | 5    | 2766.15 | 63.30   | 0.00    |
| <i>P. pipistrellus</i>                    | Time block             | log          | Poisson           | 5    | 1732.04 | 0.00    | 0.58    |
|                                           | Deterrent + time block | log          | Poisson           | 6    | 1733.31 | 1.30    | 0.31    |
|                                           | Deterrent + time block | log          | Negative binomial | 7    | 1735.33 | 3.30    | 0.11    |
|                                           | Deterrent              | log          | Poisson           | 5    | 1742.20 | 10.20   | 0.00    |
| <i>Nyctalus</i> and <i>Eptesicus</i> spp. | Deterrent + time block | log          | Poisson           | 6    | 572.99  | 0       | 0.508   |
|                                           | Time block             | log          | Poisson           | 5    | 574.735 | 1.7     | 0.213   |
|                                           | Deterrent + time block | log          | Negative binomial | 7    | 575.017 | 2       | 0.185   |
|                                           | Deterrent              | log          | Poisson           | 5    | 576.381 | 3.4     | 0.094   |
| <i>P. pygmaeus</i> (fb)                   | Deterrent + time block | log          | Negative binomial | 6    | 3889.00 | 0.00    | 0.64    |
|                                           | Deterrent              | log          | Negative binomial | 7    | 3890.74 | 1.70    | 0.27    |
|                                           | Deterrent              | log          | Negative binomial | 5    | 3892.97 | 4.00    | 0.09    |
|                                           | null                   | log          | Poisson           | 6    | 3934.89 | 45.90   | 0.00    |
| <i>P. pygmaeus</i> (sc)                   | Deterrent              | log          | Negative binomial | 6    | 2540.75 | 0.00    | 0.60    |
|                                           | Deterrent + time block | log          | Negative binomial | 7    | 2541.96 | 1.20    | 0.33    |
|                                           | null                   | log          | Negative binomial | 5    | 2545.08 | 4.30    | 0.07    |
|                                           | Deterrent              | log          | Poisson           | 6    | 2782.80 | 242.10  | 0.00    |

**Table S3.** Model selection statistics for bat echolocation call parameter data. Models arranged by AICc weight (AICc Wt) and include number of model parameters (K), cumulative AICc weight (Cum. Wt).

| Parameter | Model                               | Distribution | K  | AICc    | $\Delta$ AICc | AICc Wt | Cum. Wt |
|-----------|-------------------------------------|--------------|----|---------|---------------|---------|---------|
| Bandwidth | Deterrent + no of bats + time block | Gaussian     | 10 | 6202.54 | 0.00          | 0.53    | 0.53    |
|           | Deterrent + no of bats              | Gaussian     | 9  | 6202.80 | 0.30          | 0.46    | 0.99    |
|           | Deterrent + time block              | Gaussian     | 9  | 6211.61 | 9.10          | 0.01    | 1.00    |
|           | No of bats                          | Gaussian     | 8  | 6212.70 | 10.20         | 0.00    | 1.00    |
| Peak F    | null                                | Gaussian     | 7  | 3366.28 | 0.00          | 0.75    | 0.75    |
|           | Deterrent                           | Gaussian     | 8  | 3368.82 | 2.50          | 0.21    | 0.96    |
|           | Deterrent + time block + no of bats | Gaussian     | 10 | 3373.37 | 7.10          | 0.02    | 0.98    |
|           | Deterrent + time block              | Gaussian     | 9  | 3373.95 | 7.70          | 0.02    | 1.00    |
| Duration  | null                                | Gaussian     | 7  | 2139.23 | 0.00          | 0.78    | 0.78    |
|           | Deterrent                           | Gaussian     | 8  | 2142.56 | 3.30          | 0.15    | 0.92    |
|           | Deterrent + no of bats              | Gaussian     | 9  | 2143.91 | 4.70          | 0.07    | 1.00    |
|           | Deterrent + no of bats + time block | Gaussian     | 10 | 2150.72 | 11.50         | 0.00    | 1.00    |
| IPI       | Deterrent + time block + no of bats | Gaussian     | 10 | 7185.86 | 0.00          | 0.55    | 0.55    |
|           | Deterrent + time block              | Gaussian     | 9  | 7186.98 | 1.10          | 0.31    | 0.86    |
|           | null                                | Gaussian     | 8  | 7188.60 | 2.70          | 0.14    | 1.00    |
|           | Deterrent                           | Gaussian     | 8  | 7198.11 | 12.20         | 0.00    | 1.00    |
| Start F   | Deterrent + no of bats              | Gaussian     | 9  | 6240.43 | 0.00          | 0.50    | 0.50    |
|           | Deterrent + time block + no of bats | Gaussian     | 10 | 6240.43 | 0.00          | 0.50    | 0.99    |
|           | No of bats                          | Gaussian     | 8  | 6249.57 | 9.10          | 0.01    | 1.00    |
|           | Deterrent + block number            | Gaussian     | 9  | 6251.51 | 11.10         | 0.00    | 1.00    |
| End F     | No of bats                          | Gaussian     | 8  | 2892.87 | 0.00          | 0.76    | 0.76    |
|           | Deterrent + no of bats              | Gaussian     | 9  | 2895.27 | 2.40          | 0.23    | 0.98    |
|           | Deterrent + time block + no of bats | Gaussian     | 10 | 2901.13 | 8.30          | 0.01    | 1.00    |
|           | Deterrent + time block              | Gaussian     | 9  | 2903.84 | 11.00         | 0.00    | 1.00    |

## References

Bazley EN. 1976. Sound absorption in air at frequencies up to 100 kHz. NPL Acoustics Report Ac 74, National Physical Laboratory, Teddington, England.

Holderied MW, von Helversen O. 2003. Echolocation range and wingbeat period match in aerial-hawking bats. *Proceedings of the Royal Society B-Biological Sciences* 270:2293-2299.

Møhl B. 1988. Target detection by echolocating bats. In: Nachtigal, PE, & Moore, PWB *Animal sonar: processes and performance*, Plenum Press, New York, USA 156:435–450.
